# Supplementary material
Source: PubMed Central journal article supplement (PMC7381365)
Supplement: NIHMS1587972-supplement-1.pdf [file NIHMS1587972-supplement-1.pdf]

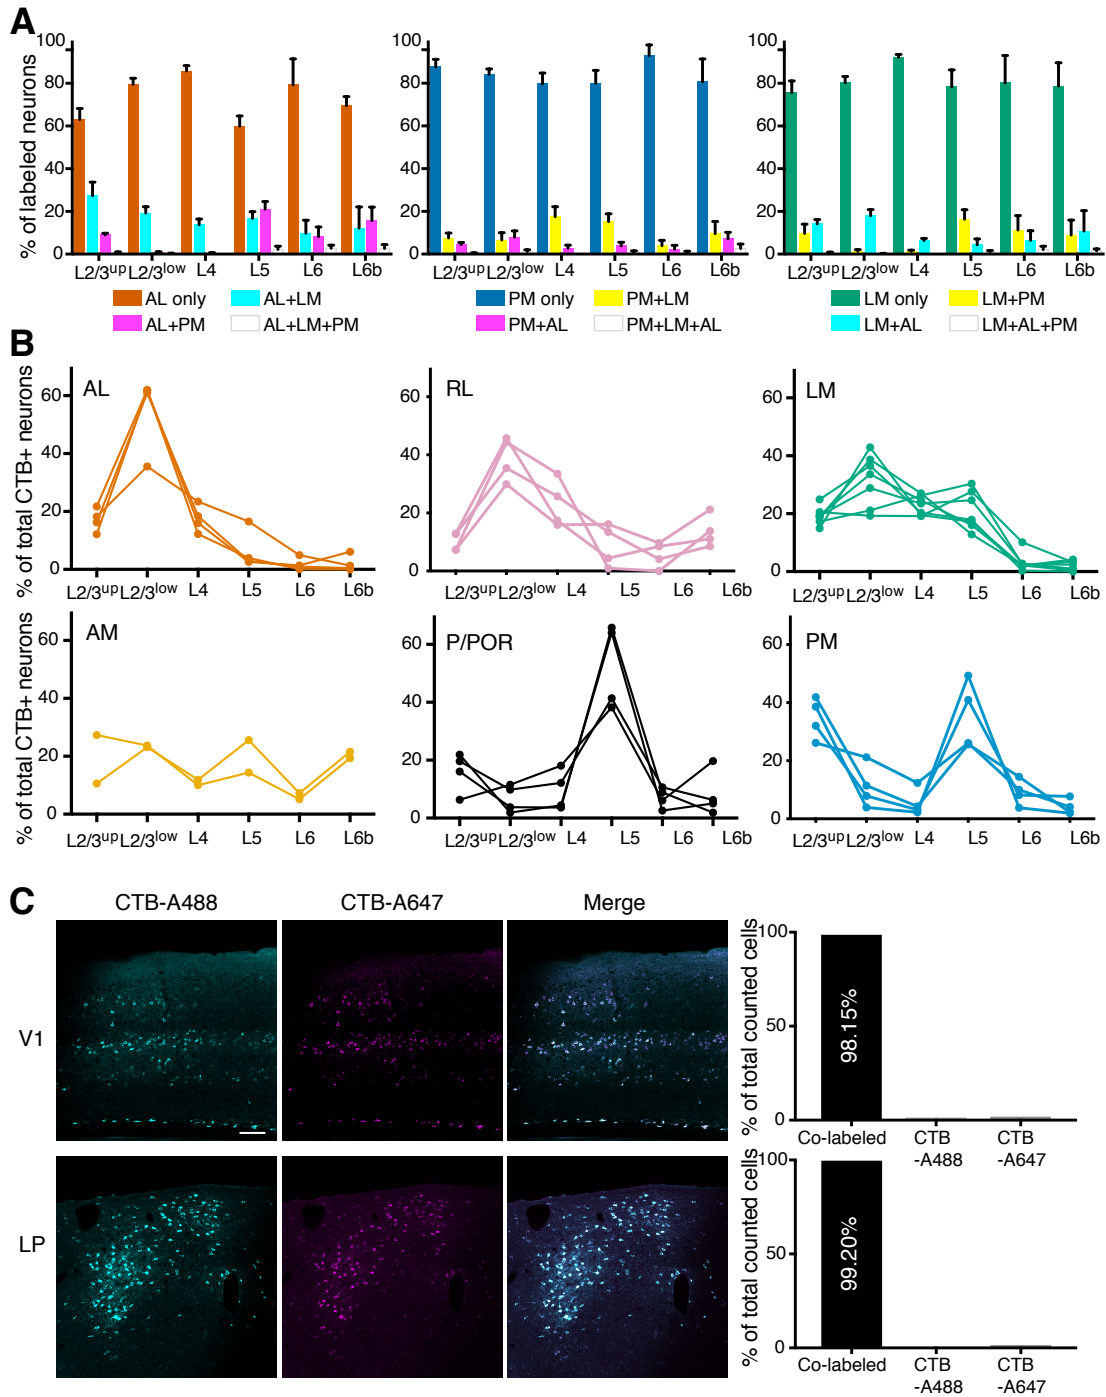

**Figure S1. Additional Data to Analyze CTB-labeled V1 Neurons Projecting to HVAs, Related to Figure 1. (A)** Distributions of single, double, triple labeled V1 CCPNs in specific layers after CTB injections to AL, PM, and LM. Plots displayed for AL-projecting neurons (left), PM-projecting neurons (middle), and LM-projecting neurons (right). **(B)** Distributions of V1 neuronal locations projecting to AL, RL, LM, AM, P/POR, and PM for individual animals. **(C)** Labeling efficiency of CTB. A mixture of CTB-A488 (final 0.33%) and CTB-A647 (final 0.33%) was injected into a lateral V2 region of mouse brain. Co-labeled neurons were counted in V1 (top) and LP (bottom). Scale bar, 100 $\mu$ m.

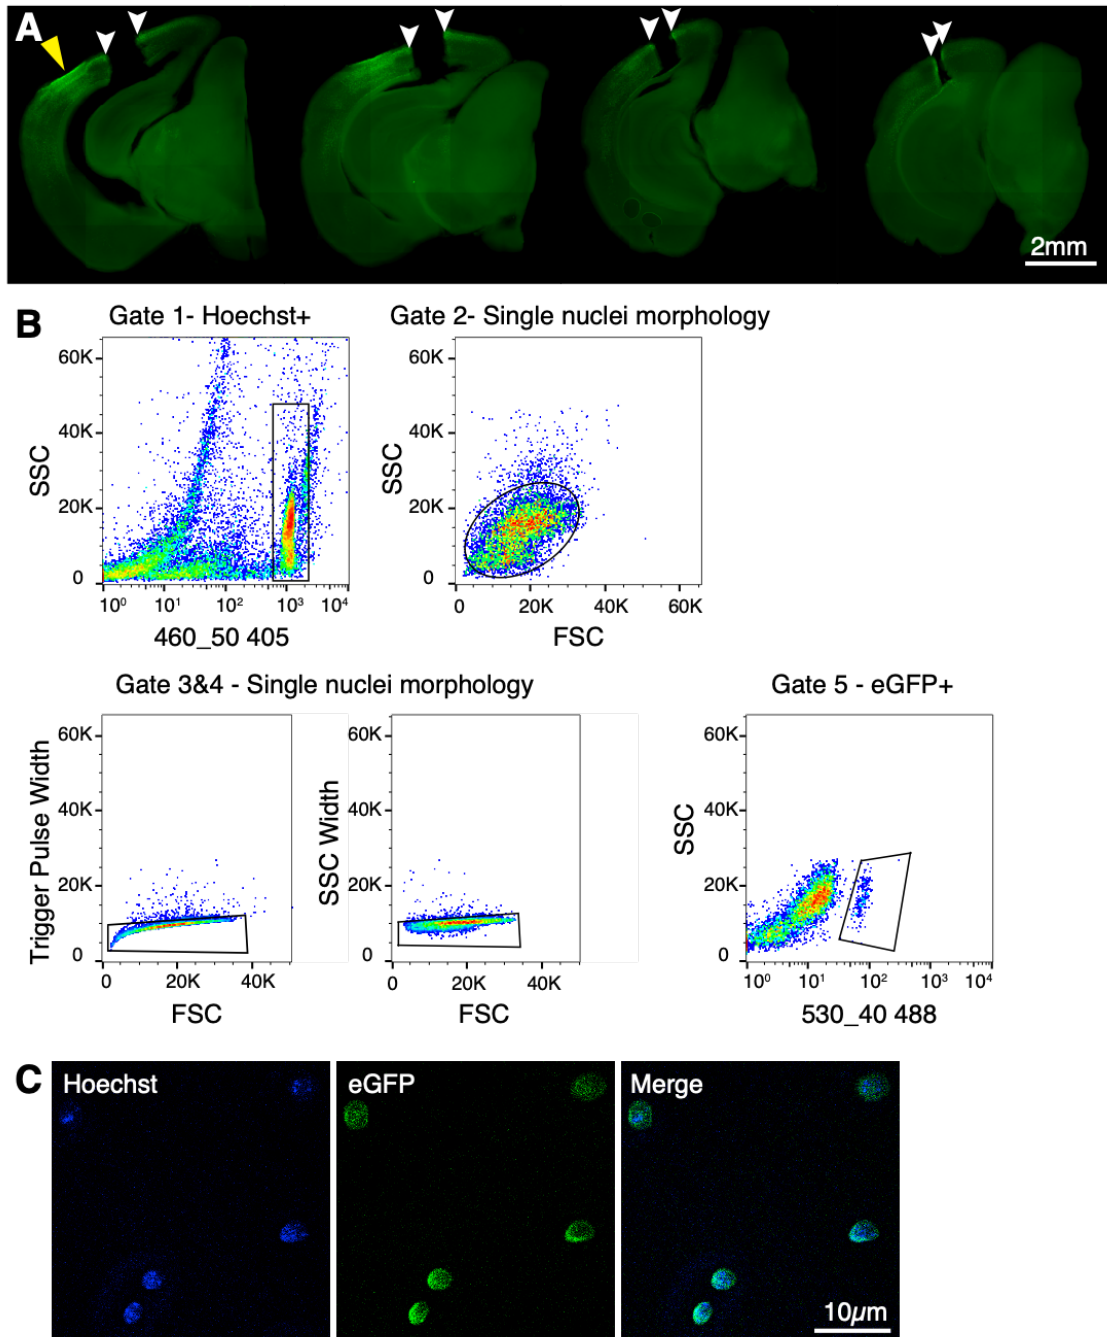

**Figure S2. Experimental Details on GFP+ Single Nuclei Dissociation Workflow, Related to Figure 2.** (A) Examples of coronal brain slices of *R26R-CAG-loxp-stop-loxp-Sun1-sfGFP-Myc* after V1 dissections (white arrowheads). AAVretro-Cre was injected in AL (yellow arrow). (B) Detailed gating information of fluorescence-activated nuclei sorting (FANS). Gate 1 selects Hoechst+ nuclei to exclude debris, while gates 2-4 exclude cell doublets based on single nuclei morphology. Gate 5 selects high eGFP fluorescence. (C) Post-sorting examination of single nuclei on the slide for quality control.

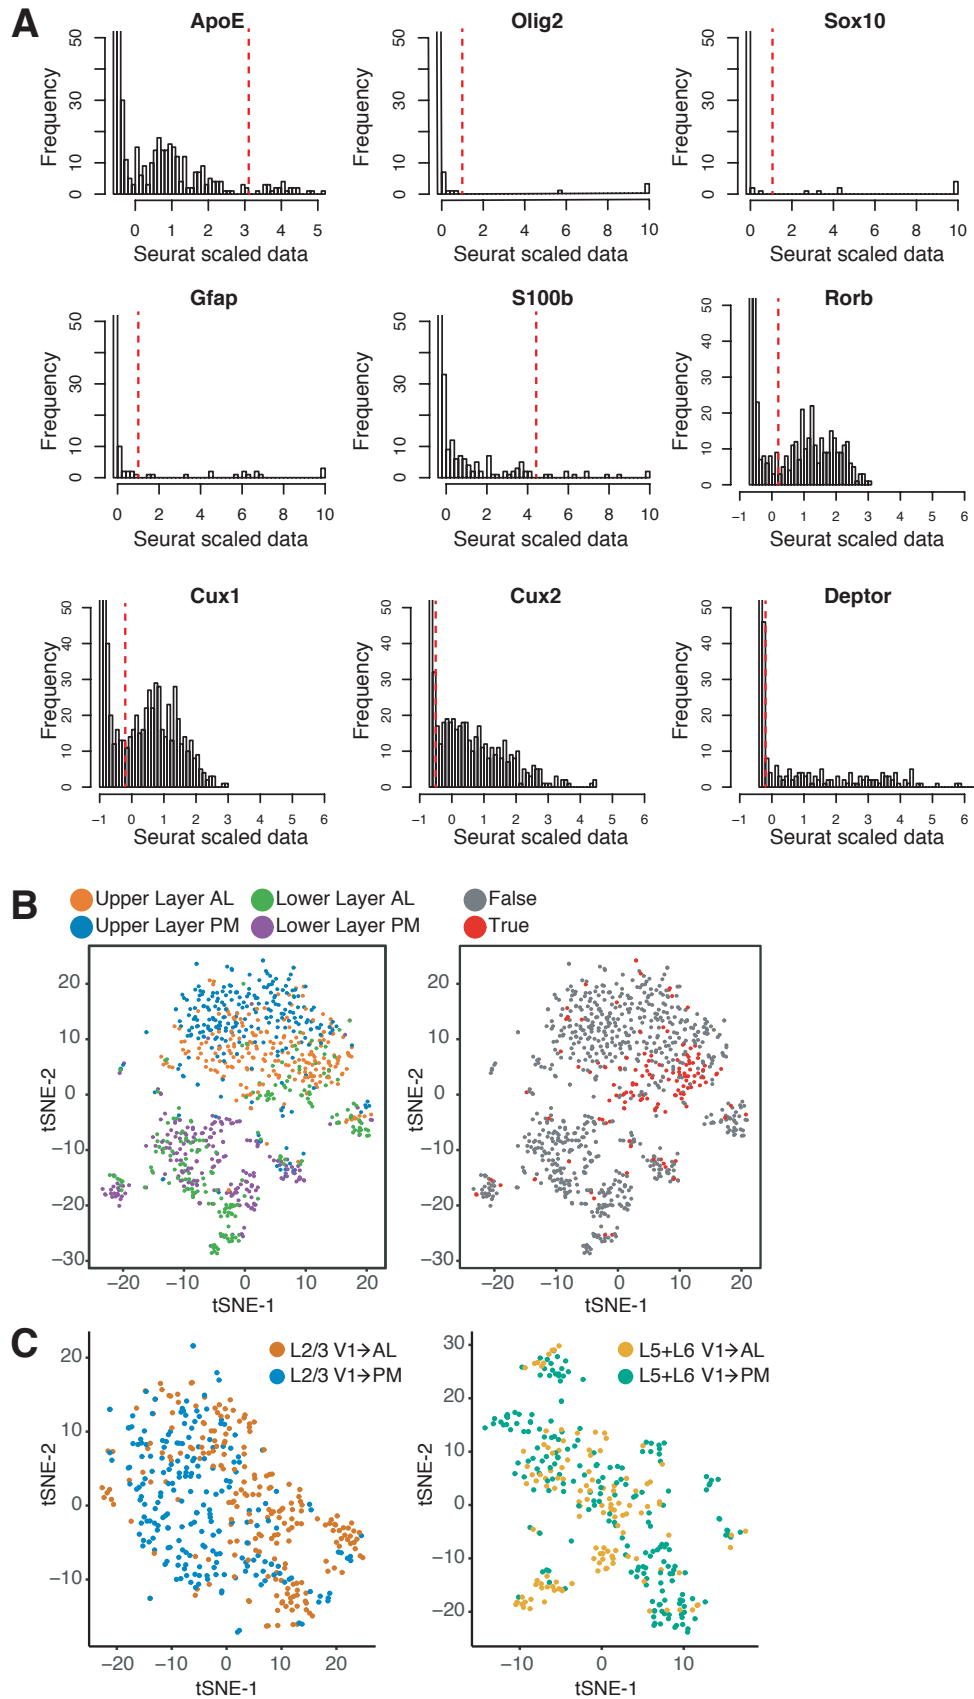

**Figure S3. Additional Data for Single-nuclei RNA Sequencing, Related to Figure 2. (A) Data analysis**

for filtering out glia cells and L4 neurons. The molecular marker distributions of Seurat scaled logNorm values across all cells to filter glia at specified expression level cutoffs (ApoE: 3.1, Olig2: 1, Sox10: 1, Gfap: 1, S100b: 4.2). The molecular marker distributions of Seurat scaled logNorm values across remaining cells after filtering out glia to define L4 neurons at specified expression level cutoffs (Rorb: 0.2, Cux1: -0.2, Cux2: -0.5, Deptor: -0.2). **(B)** tSNE plot of all neurons labeled by dissected layers and projections (left) and tSNE plot labeled by L4 (true) and non-L4 (false) neurons (right). **(C)** Unsupervised clustering analysis using tSNE plots based on single nuclei level gene expressions of L2/3 (left) or L5 and L6 (right) neurons.



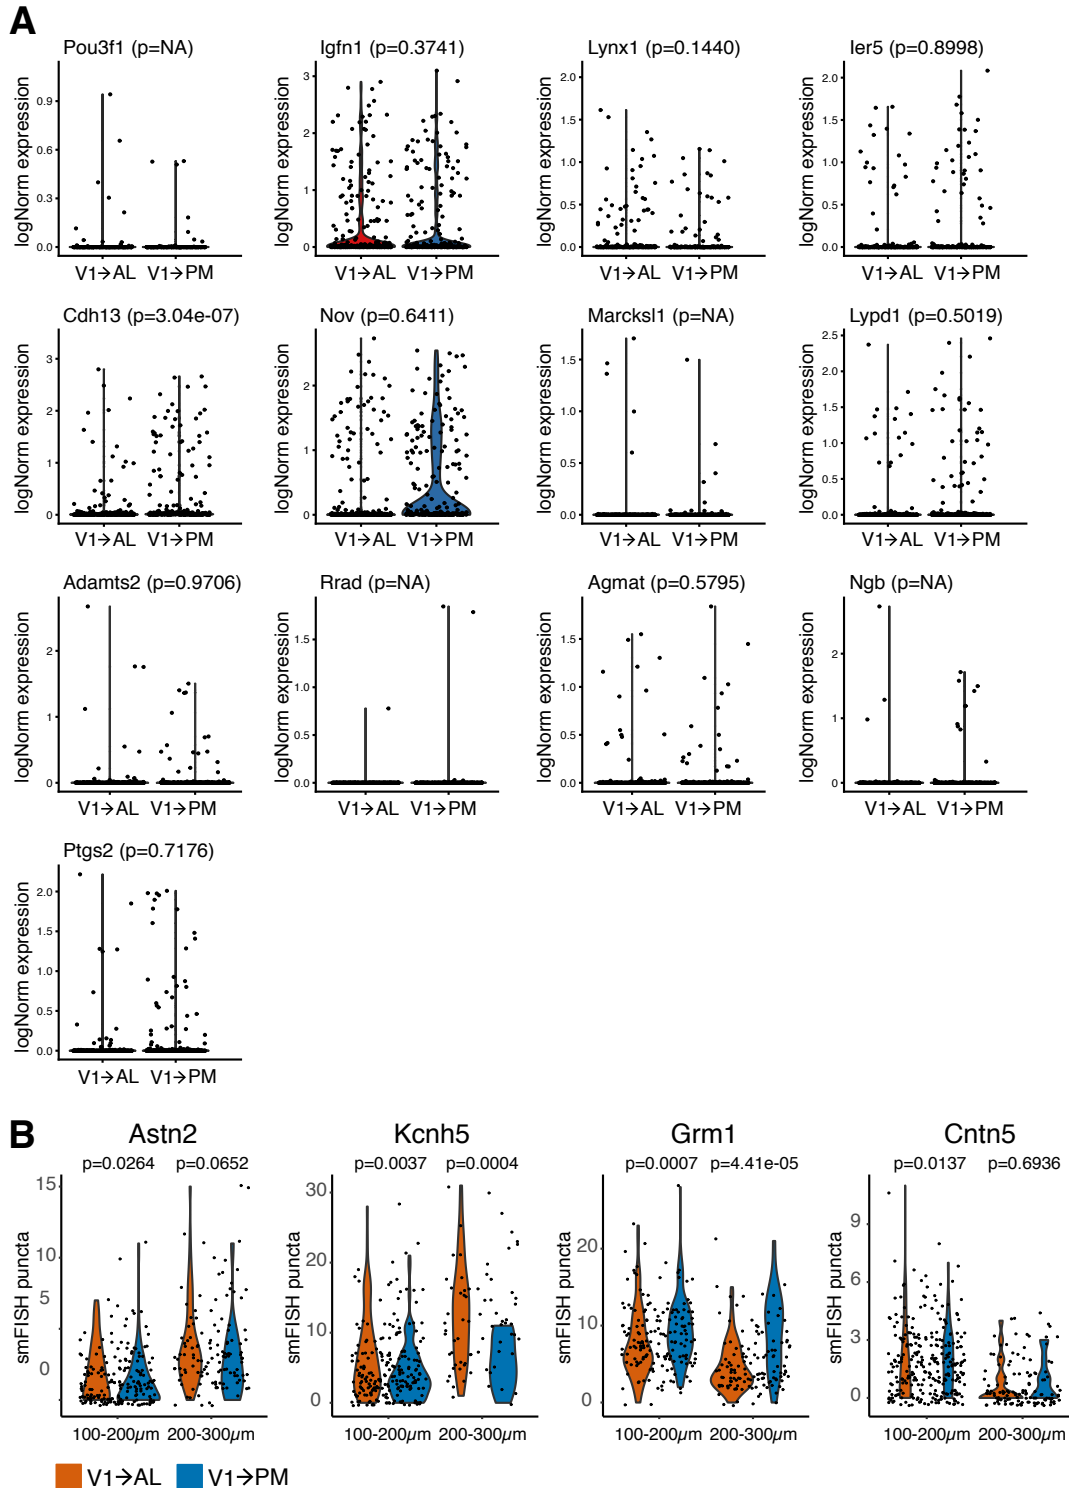

**Figure S4. Additional Data for Single-nuclei RNA Sequencing and Single Molecule FISH (smFISH), Related to Figure 2. (A)** Gene expression profiles of the reported L2/3 sub-cluster molecular markers on V1→AL and V1→PM neurons. L2/3 sub-cluster makers published in Hrvatin et al. 2018 (Hrvatin et al., 2018) are Pou3f1, Igfn1, Lynx1, Ier5, Cdh13, Nov, Marcks11, and Lypd1. L2/3 sub-cluster makers published in Tasic et al. 2018 (Tasic et al., 2018) are Adamts2, Rrad, and Agmat. L2/3 sub-cluster makers

published in Tasic et al. 2016 (Tasic et al., 2016) are *Ngf* and *Ptgs2*. P values were reported as NA when the gene was expressed in less than 5% of cells. **(B)** smFISH puncta counts within two different cortical depth bins from the pia for V1→AL and V1→PM neurons. Violin plots displaying smFISH puncta count of four differentially expressed gene markers per cell on V1→AL and V1→PM types. Counts were done with two bins, 100-200µm and 200-300µm from the pia. Wilcoxon rank-sum test was used for statistical analyses in three animals (except *Kcnn5* for two animals).

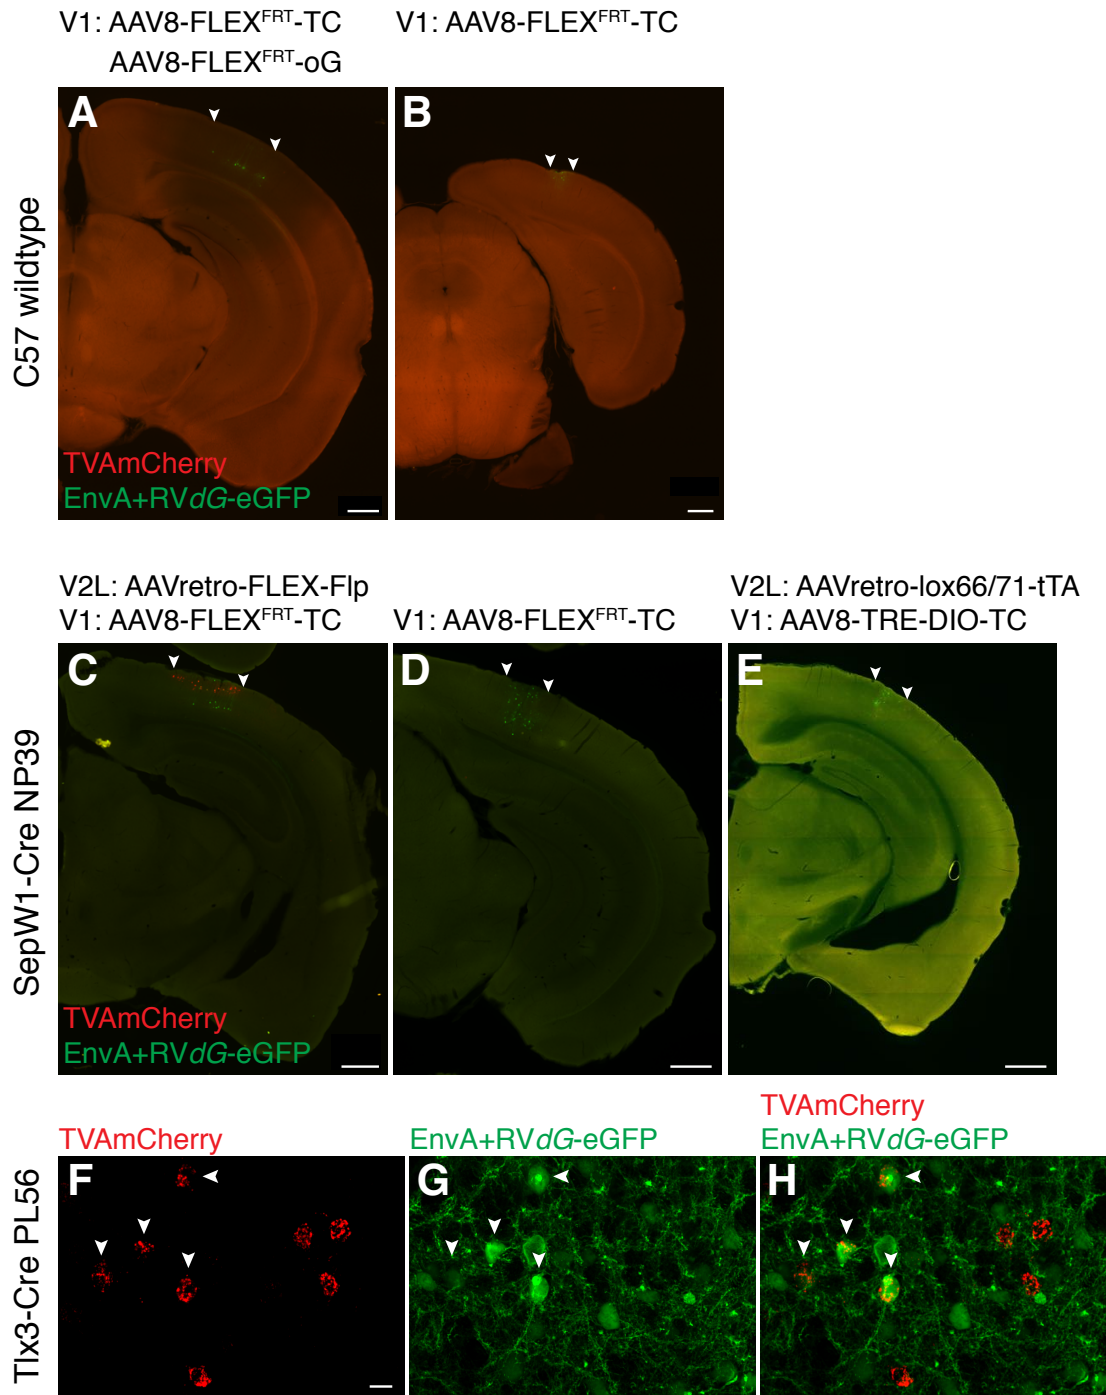

**Figure S5. Control Experiments for Rabies Trans-synaptic Tracing, Related to Figure 3.** (A-B) Coronal sections of C57 wildtype mouse brains after AAV8-FLEX<sup>ftt</sup>-TVAmCherry(TC) and AAV8-FLEX<sup>ftt</sup>-oG (A) or AAV8-FLEX<sup>ftt</sup>-TC (B) injections followed by EnvA+RVdG-eGFP injection on V1. (C-D) Coronal sections of SepW1-Cre NP39 mouse brains after AAV8-FLEX<sup>ftt</sup>-TC injections on V1 and AAVretro-FLEX<sup>loxsp</sup>-Flp on V2L (C) or AAV8-FLEX<sup>ftt</sup>-TC (D) injection on V1 followed by EnvA+RVdG-eGFP injection on V1. (E) Coronal section of SepW1-Cre NP39 mouse brain after

AAVretro-lox66/71-tTA on V2L and AAV8-TRE-DIO-TC injection on V1 followed by EnvA+RVdG-eGFP injection on V1. Scale bars, 500 $\mu$ m. **(F-H)** Tangential section of Tlx3-Cre PL56 mouse V1 showing putative TVAmCherry+ eGFP+ starter neurons (arrowheads) after AAV8-FLEX<sup>flt</sup>-TC and AAV8-FLEX<sup>flt</sup>-oG followed by EnvA+RVdG-eGFP injection on V1. Scale bar, 10 $\mu$ m.

| <b>Mouse #</b> | <b>CTB-A488</b> | <b>CTB-A555</b> | <b>CTB-A647</b> |
|----------------|-----------------|-----------------|-----------------|
| C-01           | RL              |                 | LM              |
| C-02           | RL              | LM              |                 |
| C-03           |                 | RL              | LM              |
| C-04           |                 | P/POR           | AM              |
| C-05           | P/POR           | PM              |                 |
| C-06           | PM              | P/POR           | LM              |
| C-07           |                 | P/POR           | AM              |
| C-08           | AL              | PM              | LM              |
| C-09           | AL              | LM              |                 |
| C-10           | AL              | PM              | LM              |
| C-11           | LM              | PM              | AL              |
| C-12           |                 |                 | RL              |

| <b>P/POR</b> | <b>LM</b> | <b>AL</b> | <b>RL</b> | <b>AM</b> | <b>PM</b> |
|--------------|-----------|-----------|-----------|-----------|-----------|
| C-04         | C-01      | C-08      | C-01      | C-04      | C-06      |
| C-05         | C-02      | C-09      | C-02      | C-07      | C-08      |
| C-06         | C-06      | C-10      | C-03      |           | C-10      |
| C-07         | C-08      | C-11      | C-12      |           | C-11      |
|              | C-09      |           |           |           |           |
|              | C-10      |           |           |           |           |
|              | C-11      |           |           |           |           |

**Table S1. Summary of Cholera Toxin Subunit B Injected Animals, Related to Figure 1.**

| <b>L2/3<sup>Upper</sup></b> |      | <b>P/POR</b> | <b>LM</b> | <b>AL</b> | <b>RL</b> | <b>AM</b> | <b>PM</b> |
|-----------------------------|------|--------------|-----------|-----------|-----------|-----------|-----------|
| <b>P/POR</b>                |      |              | ns        | ns        | ns        | ns        | **        |
| <b>LM</b>                   | ns   |              |           | ns        | ns        | ns        | **        |
| <b>AL</b>                   | ns   | ns           |           |           | ns        | ns        | **        |
| <b>RL</b>                   | ns   | ns           | ns        |           |           | ns        | ****      |
| <b>AM</b>                   | ns   | ns           | ns        | ns        |           |           | ns        |
| <b>PM</b>                   | **   | **           | **        | ****      | ns        |           |           |
| <b>L2/3<sup>Lower</sup></b> |      | <b>P/POR</b> | <b>LM</b> | <b>AL</b> | <b>RL</b> | <b>AM</b> | <b>PM</b> |
| <b>P/POR</b>                |      |              | ****      | ****      | ****      | *         | ns        |
| <b>LM</b>                   | **** |              |           | ****      | ns        | ns        | ****      |
| <b>AL</b>                   | **** | ****         |           |           | **        | ****      | ****      |
| <b>RL</b>                   | **** | ns           | **        |           |           | ns        | ****      |
| <b>AM</b>                   | *    | ns           | ****      | ns        |           |           | ns        |
| <b>PM</b>                   | ns   | ****         | ****      | ****      | ns        |           |           |
| <b>L4</b>                   |      | <b>P/POR</b> | <b>LM</b> | <b>AL</b> | <b>RL</b> | <b>AM</b> | <b>PM</b> |
| <b>P/POR</b>                |      |              | *         | ns        | *         | ns        | ns        |
| <b>LM</b>                   | *    |              |           | ns        | ns        | ns        | ***       |
| <b>AL</b>                   | ns   | ns           |           |           | ns        | ns        | ns        |
| <b>RL</b>                   | *    | ns           | ns        |           |           | ns        | **        |
| <b>AM</b>                   | ns   | ns           | ns        | ns        |           |           | ns        |
| <b>PM</b>                   | ns   | ***          | ns        | **        | ns        |           |           |
| <b>L5</b>                   |      | <b>P/POR</b> | <b>LM</b> | <b>AL</b> | <b>RL</b> | <b>AM</b> | <b>PM</b> |
| <b>P/POR</b>                |      |              | ****      | ****      | ****      | ****      | **        |
| <b>LM</b>                   | **** |              |           | **        | *         | ns        | **        |
| <b>AL</b>                   | **** | **           |           |           | ns        | ns        | ****      |
| <b>RL</b>                   | **** | *            | ns        |           |           | ns        | ****      |
| <b>AM</b>                   | **** | ns           | ns        | ns        |           |           | ns        |
| <b>PM</b>                   | **   | **           | ****      | ****      | ns        |           |           |
| <b>L6</b>                   |      | <b>P/POR</b> | <b>LM</b> | <b>AL</b> | <b>RL</b> | <b>AM</b> | <b>PM</b> |
| <b>P/POR</b>                |      |              | ns        | ns        | ns        | ns        | ns        |
| <b>LM</b>                   | ns   |              |           | ns        | ns        | ns        | ns        |
| <b>AL</b>                   | ns   | ns           |           |           | ns        | ns        | ns        |
| <b>RL</b>                   | ns   | ns           | ns        |           |           | ns        | ns        |
| <b>AM</b>                   | ns   | ns           | ns        | ns        |           |           | ns        |
| <b>PM</b>                   | ns   | ns           | ns        | ns        | ns        |           |           |
| <b>L6b</b>                  |      | <b>P/POR</b> | <b>LM</b> | <b>AL</b> | <b>RL</b> | <b>AM</b> | <b>PM</b> |
| <b>P/POR</b>                |      |              | ns        | ns        | ns        | ns        | ns        |
| <b>LM</b>                   | ns   |              |           | ns        | ns        | **        | ns        |
| <b>AL</b>                   | ns   | ns           |           |           | ns        | *         | ns        |
| <b>RL</b>                   | ns   | ns           | ns        |           |           | ns        | ns        |
| <b>AM</b>                   | ns   | **           | *         | ns        |           |           | *         |
| <b>PM</b>                   | ns   | ns           | ns        | ns        |           | *         |           |

**Table S2. Two-way ANOVA Analysis with Tukey's Multiple Comparisons Test of CTB+ Neurons between Projection Areas and Layers, Related to Figure 1. \*p<0.05, \*\*p<0.01, \*\*\*p<0.001, \*\*\*\*p<0.0001, ns=not statistically significant**

|                         |          |          |          |          |       |       |       |
|-------------------------|----------|----------|----------|----------|-------|-------|-------|
| Animals                 | T31      | T35      | T41      | T44      | T45   | T50   | T55   |
| # nuclei                | 195      | 17       | 31       | 193      | 258   | 167   | 82    |
| Projection              | AL       | PM       |          |          |       |       |       |
| # nuclei                | 461      | 482      |          |          |       |       |       |
| Dissection              | Upper    | Lower    |          |          |       |       |       |
| # nuclei                | 501      | 442      |          |          |       |       |       |
| Projection + Dissection | Upper AL | Upper PM | Lower AL | Lower PM |       |       |       |
| # nuclei                | 239      | 262      | 222      | 220      |       |       |       |
| Plate                   | T31_1    | T31_2    | T31_3    | T41/T35  | T44_1 | T44_2 | T44_3 |
| # nuclei                | 74       | 62       | 59       | 48       | 62    | 69    | 62    |
| Plate                   | T45_1    | T45_3    | T45_4    | T50_1    | T50_3 | T55_3 |       |
| # nuclei                | 86       | 84       | 88       | 84       | 83    | 82    |       |
| Sequencing Run          | R1       | R2       | R3       | R4       | R5    | R6    | R7    |
| # nuclei                | 74       | 121      | 131      | 110      | 167   | 170   | 170   |

**Table S3. Summary of Single Nuclei Information for RNAseq, Related to Figure 2.**

Supplemental tables below are provided separately as Excel files in a zip file.

**Table S4. Single Nuclei Sequencing Sample Metadata, Related to Figure 2.**

**Table S5. Differentially Expressed Genes List for V1→AL and V1→PM in L2/3 Using Zinbwave-EdgeR, Related to Figure 2.**

**Table S6. Differentially Expressed Genes List for V1→AL and V1→PM in L5 and L6 Using Zinbwave-EdgeR, Related to Figure 2.**

**Table S7. Differentially Expressed Genes List for V1→AL and V1→PM in L2/3 Using Zinbwave-DESeq2, Related to Figure 2.**

**Table S8. Differentially Expressed Genes List for V1→AL and V1→PM in L5 and L6 Using Zinbwave-DESeq2, Related to Figure 2.**

**Table S9. Virus Injection and Animal Information for Rabies Tracing, Related to Figure 3.**

**Table S10. Quantification of Rabies Tracing Data, Related to Figure 3.**
